# Supplementary material for: Complete Genome Sequence of Weissella cibaria NH9449 and Comprehensive Comparative-Genomic Analysis: Genomic Diversity and Versatility Trait Revealed
Source: Frontiers journal article supplement (doi:10.3389/fmicb.2022.826683), 2022-05-19
Supplement: Data_Sheet_1.XLSX [file Data_Sheet_1.XLSX]

## Sheet: Sheet1
Table S1 List of bacterial strains used in this study
Organism Name	Strain	BioSample	BioProject	Assembly	Level	Size(Mb)	GC%	Replicons	Scaffolds	CDS	Release Date
Weissella beninensis	DSM 22752	SAMN17619982	PRJNA695610	GCA_016908275.1	Contig	1.83852	35.4		62	1735	2021-02-19
Weissella bombi	DSM 28794	SAMD00164449	PRJDB7793	GCA_005405505.1	Contig	1.82393	36.9		14	1721	2019-03-29
Weissella bombi	R-53094	SAMN04487794	PRJEB15024	GCA_900094835.1	Scaffold	1.8209	36.9		29	1724	2016-08-03
Weissella ceti	CECT 7719	SAMN19073728	PRJNA728254	GCA_018394055.1	Complete	1.50579	40.7	chromosome:NZ_CP074441.1/CP074441.1	1	1465	2021-05-18
Weissella ceti	NC36	SAMN02472059	PRJNA176505	GCA_000320345.1	Contig	1.35264	40.8		7	1259	2012-12-13
Weissella ceti	WS08	SAMN02716090	PRJNA243375	GCA_000732905.1	Complete	1.35585	40.8	chromosome:NZ_CP007588.1/CP007588.1	1	1251	2014-07-24
Weissella ceti	WS105	SAMN02947896	PRJNA257149	GCA_000750535.1	Complete	1.3904	40.7	chromosome:NZ_CP009224.1/CP009224.1	1	1268	2014-09-09
Weissella ceti	WS74	SAMN02947894	PRJNA257148	GCA_000750515.1	Complete	1.38951	40.7	chromosome:NZ_CP009223.1/CP009223.1	1	1287	2014-09-09
Weissella cibaria	85	SAMN14541404	PRJNA623195	GCA_012277055.1	Scaffold	2.62823	45.4		440	2501	2020-04-13
Weissella cibaria	92	SAMN14541405	PRJNA623195	GCA_012277025.1	Contig	2.48095	44.8		70	2220	2020-04-13
Weissella cibaria	110	SAMN04441479	PRJNA309892	GCA_002614625.1	Scaffold	2.34705	44.9		18	2135	2017-10-19
Weissella cibaria	142	SAMN14541406	PRJNA623195	GCA_012277245.1	Scaffold	2.64624	45.2		368	2474	2020-04-13
Weissella cibaria	1001283B150209_150212_A5	SAMN15634173	PRJNA637878	GCA_015552515.1	Scaffold	2.48647	44.9		26	2261	2020-11-17
Weissella cibaria	1001287H_170206_A9	SAMN15533031	PRJNA637878	GCA_015559665.1	Scaffold	2.48573	44.7		37	2265	2020-11-17
Weissella cibaria	1001713B170221_170320_B3	SAMN15532748	PRJNA637878	GCA_015551705.1	Contig	2.46204	44.7		145	2243	2020-11-17
Weissella cibaria	10M	SAMN13006690	PRJNA576760	GCA_009864045.1	Scaffold	2.42625	44.9		4	2199	2020-01-13
Weissella cibaria	3.8.44	SAMN18995118	PRJNA674638	GCA_018993825.1	Contig	2.42594	45.1		27	2219	2021-06-23
Weissella cibaria	7.8.34	SAMN18995143	PRJNA674638	GCA_018991795.1	Contig	2.44313	44.8		34	2269	2021-06-23
Weissella cibaria	A23	SAMN10822535	PRJNA517196	GCA_011009635.1	Contig	2.45564	45		62	2285	2020-02-25
Weissella cibaria	AB3b	SAMN03223848	PRJNA268711	GCA_000878185.1	Scaffold	2.46516	44.7		88	2252	2015-02-19
Weissella cibaria	AM27-22LB	SAMN09736351	PRJNA482748	GCA_003469985.1	Scaffold	2.50635	44.8		15	2326	2018-09-06
Weissella cibaria	AM27-24	SAMN09736352	PRJNA482748	GCA_003469955.1	Scaffold	2.50565	44.8		16	2325	2018-09-06
Weissella cibaria	AV1	SAMN14541407	PRJNA623195	GCA_012277235.1	Scaffold	2.5406	44.9		152	2294	2020-04-13
Weissella cibaria	BC10	SAMN12316825	PRJNA555367	GCA_007785585.1	Contig	2.51048	44.9		5	2244	2019-07-31
Weissella cibaria	BC14	SAMN12317594	PRJNA555367	GCA_007785645.1	Contig	2.51323	44.9		3	2238	2019-07-31
Weissella cibaria	BM2	SAMN08628864	PRJNA436626	GCA_003010455.1	Complete	2.47351	45.0669	chromosome:NZ_CP027427.1/CP027427.1; plasmid pBM2:NZ_CP027428.1/CP027428.1	2	2158	2018-03-19
Weissella cibaria	CBA3612	SAMN12084129	PRJNA549358	GCA_006517775.1	Complete	2.45768	45.0174	chromosome:NZ_CP041193.1/CP041193.1; plasmid pCBA3612-01:NZ_CP041194.1/CP041194.1; plasmid pCBA3612-02:NZ_CP041195.1/CP041195.1; plasmid pCBA3612-03:NZ_CP041196.1/CP041196.1	4	2188	2019-07-01
Weissella cibaria	CBA3636	SAMN15659522	PRJNA649124	GCA_014081885.1	Complete	2.42371	45.012	chromosome:NZ_CP059699.1/CP059699.1; plasmid pCBA3636-01:NZ_CP059700.1/CP059700.1; plasmid pCBA3636-02:NZ_CP059701.1/CP059701.1	3	2165	2020-08-06
Weissella cibaria	cf-23	SAMN09531641	PRJNA478797	GCA_008691985.1	Contig	2.35395	45.2		48	2147	2019-09-24
Weissella cibaria	CH2	SAMN04120644	PRJNA297257	GCA_001308145.2	Complete	2.57773	44.7462	chromosome:NZ_CP012873.1/CP012873.1; plasmid pMKC01:NZ_CP012874.1/CP012874.1; plasmid pMKC02:NZ_CP012875.1/CP012875.1; plasmid pMKC03:NZ_CP012876.1/CP012876.1; plasmid pMKC04:NZ_CP012877.1/CP012877.1; plasmid pMKC05:NZ_CP012878.1/CP012878.1; plasmid pMKC07:NZ_CP012880.1/CP012880.1	7	2294	2015-10-08
Weissella cibaria	CMS1	SAMN07414780	PRJNA395775	GCA_002243305.1	Complete	2.34285	45.3	chromosome:NZ_CP022606.1/CP022606.1	1	2048	2017-08-08
Weissella cibaria	CMS2	SAMN04328345	PRJNA305557	GCA_001932695.1	Complete	2.34291	45.3	chromosome:NZ_CP013726.1/CP013726.1	1	2059	2017-01-04
Weissella cibaria	CMS3	SAMN04328350	PRJNA305558	GCA_001951095.1	Complete	2.36349	45.239	chromosome:NZ_CP013934.1/CP013934.1; plasmid unnamed:NZ_CP013935.1/CP013935.1	2	2080	2017-01-13
Weissella cibaria	CMU	SAMN04328351	PRJNA305559	GCA_001951075.2	Complete	2.38147	45.245	chromosome:NZ_CP013936.1/CP013936.1; plasmid unnamed1:NZ_CP013937.1/CP013937.1	2	2084	2017-01-13
Weissella cibaria	CT-37	SAMN09531783	PRJNA478799	GCA_008691995.1	Scaffold	2.37638	45.2		42	2158	2019-09-24
Weissella cibaria	D6t1_180914_E9	SAMN15532602	PRJNA637878	GCA_015558475.1	Scaffold	2.42651	45		37	2177	2020-11-17
Weissella cibaria	DK12	SAMN12318339	PRJNA555367	GCA_007785715.1	Contig	2.55797	44.8		4	2151	2019-07-31
Weissella cibaria	DmW_103	SAMN06759976	PRJNA383151	GCA_002115575.1	Contig	2.46561	45		34	2245	2017-04-28
Weissella cibaria	FBL5	SAMN04589928	PRJNA316750	GCA_001614295.1	Contig	2.31935	44.9		39	2067	2016-04-08
Weissella cibaria	ff3PR	SAMN03223849	PRJNA268711	GCA_000878215.1	Contig	2.35713	44.9		60	2116	2015-02-19
Weissella cibaria	GGI4	SAMN12318342	PRJNA555367	GCA_007785725.1	Contig	2.57156	44.8		2	2306	2019-07-31
Weissella cibaria	GGM1	SAMN12318348	PRJNA555367	GCA_007785635.1	Contig	2.42722	45.1		2	2125	2019-07-31
Weissella cibaria	GGM13-2	SAMN12318349	PRJNA555367	GCA_007785755.1	Contig	2.49475	44.9		3	2211	2019-07-31
Weissella cibaria	GK1	SAMN12318346	PRJNA555367	GCA_007785685.1	Contig	2.54311	44.8		3	2254	2019-07-31
Weissella cibaria	GK3	SAMN12318507	PRJNA555367	GCA_007785675.1	Contig	2.43908	45		3	2116	2019-07-31
Weissella cibaria	JCM 12495	SAMD00164450	PRJDB7793	GCA_005405525.1	Contig	2.32395	45.1		25	2088	2019-03-29
Weissella cibaria	KACC 11862	SAMN02470197	PRJNA59737	GCA_000193635.2	Contig	2.31786	45.1		72	2094	2010-11-05
Weissella cibaria	KCKM 0342	SAMN21246344	PRJNA761236	GCA_020089765.1	Scaffold	2.47333	44.9		22	2198	2021-09-21
Weissella cibaria	KLK9	SAMN12318350	PRJNA555367	GCA_007785875.1	Contig	2.56157	44.8		3	2261	2019-07-31
Weissella cibaria	M2	SAMN06670431	PRJNA381106	GCA_003076495.1	Complete	2.61071	44.8391	chromosome:NZ_CP020928.1/CP020928.1; plasmid unnamed1:NZ_CP020929.1/CP020929.1; plasmid unnamed2:NZ_CP020930.1/CP020930.1	3	2379	2018-05-01
Weissella cibaria	MG1	SAMN03223844	PRJNA268711	GCA_000878205.1	Scaffold	2.43623	44.8		44	2200	2015-02-19
Weissella cibaria	MGYG-HGUT-00248	SAMEA5849750	PRJEB33885	GCA_902364765.1	Scaffold	2.50635	44.8		15	2326	2019-08-16
Weissella cibaria	MSK.22.119	SAMN22165118	PRJNA737800	GCA_020540625.1	Contig	2.47386	45		47	2268	2021-10-20
Weissella cibaria	MSK.22.120	SAMN22165119	PRJNA737800	GCA_020540635.1	Contig	2.46539	44.9		34	2256	2021-10-20
Weissella cibaria	MSK.22.122	SAMN22165120	PRJNA737800	GCA_020540565.1	Contig	2.4657	44.9		39	2259	2021-10-20
Weissella cibaria	MSK.22.123	SAMN22165121	PRJNA737800	GCA_020540595.1	Contig	2.46649	44.9		34	2258	2021-10-20
Weissella cibaria	MSK.22.127	SAMN22165122	PRJNA737800	GCA_020540585.1	Contig	2.46642	44.9		40	2259	2021-10-20
Weissella cibaria	MSK.22.130	SAMN22165123	PRJNA737800	GCA_020540525.1	Contig	2.43171	45		38	2221	2021-10-20
Weissella cibaria	MSK.22.138	SAMN22165125	PRJNA737800	GCA_020540505.1	Contig	2.46658	44.9		36	2259	2021-10-20
Weissella cibaria	MSK.22.139	SAMN22165126	PRJNA737800	GCA_020540475.1	Contig	2.46668	44.9		42	2262	2021-10-20
Weissella cibaria	OF06-4	SAMN09736723	PRJNA482748	GCA_003439565.1	Scaffold	2.42004	44.9		28	2033	2018-08-31
Weissella cibaria	P71	SAMN20525414	PRJNA751720	GCA_020084925.1	Contig	2.67746	44.4		330	2475	2021-09-21
Weissella cibaria	SP19	SAMN10783023	PRJNA516164	GCA_004521955.1	Contig	2.5046	44.9		55	2280	2019-03-29
Weissella cibaria	SP7	SAMN10784639	PRJNA516192	GCA_004521965.1	Contig	2.01021	44.3		101	1918	2019-03-29
Weissella cibaria	SRCM103448	SAMN10754492	PRJNA515381	GCA_004103655.1	Complete	2.45305	45.0296	chromosome:NZ_CP035267.1/CP035267.1; plasmid unnamed1:NZ_CP035268.1/CP035268.1; plasmid unnamed2:NZ_CP035269.1/CP035269.1; plasmid unnamed3:NZ_CP035270.1/CP035270.1	4	2151	2019-01-23
Weissella cibaria	UC4051	SAMN11026758	PRJNA524466	GCA_014694565.1	Contig	2.44363	44.7		72	2183	2020-09-22
Weissella cibaria	YRK005	SAMN15636641	PRJNA648245	GCA_014061105.1	Scaffold	2.35866	45		31	2114	2020-08-04
Weissella coleopterorum	HDW19	SAMN14260704	PRJNA609875	GCA_011304355.1	Complete	1.61888	37.2		1	1471	2020-03-16
Weissella confusa	32	SAMN08995362	PRJNA453979	GCA_003284505.1	Contig	2.28435	44.6		52	2121	2018-06-28
Weissella confusa	718955	SAMN13762322	PRJNA599876	GCA_009906195.1	Contig	2.23928	44.9		151	2027	2020-01-19
Weissella confusa	1001271B_151109_F1	SAMN15532749	PRJNA637878	GCA_015551765.1	Contig	2.20575	44.7		42	2037	2020-11-17
Weissella confusa	1001271B_151109_G12	SAMN15532707	PRJNA637878	GCA_015548055.1	Scaffold	2.26221	44.6		31	2093	2020-11-17
Weissella confusa	AB3E41	SAMEA95324668	PRJEB19512	GCA_900166935.1	Contig	2.25848	44.9		54	2031	2017-02-22
Weissella confusa	AF03-13	SAMN09734169	PRJNA482748	GCA_003466065.1	Scaffold	2.34633	44.6		29	2186	2018-09-06
Weissella confusa	AP10A	SAMN09580334	PRJNA479564	GCA_014845385.1	Contig	2.32391	44.7		56	2170	2020-10-05
Weissella confusa	BCC 2330	SAMN14219520	PRJNA609074	GCA_016466355.1	Contig	2.09675	44.9		113	1824	2021-01-04
Weissella confusa	BCC 2344	SAMN14219521	PRJNA609074	GCA_016466305.1	Contig	2.15919	45.1		78	1914	2021-01-04
Weissella confusa	BCC 2384	SAMN14219522	PRJNA609074	GCA_016466325.1	Contig	2.09057	45		91	1834	2021-01-04
Weissella confusa	BCC 3038	SAMN14219523	PRJNA609074	GCA_016466295.1	Contig	2.31596	44.7		52	2101	2021-01-04
Weissella confusa	BCC 3262	SAMN14219524	PRJNA609074	GCA_016466275.1	Contig	2.14779	44.9		98	1885	2021-01-04
Weissella confusa	BCC 4194	SAMN14219525	PRJNA609074	GCA_016466255.1	Contig	2.16736	45		81	1925	2021-01-04
Weissella confusa	BCC 4230	SAMN14219526	PRJNA609074	GCA_016466215.1	Contig	2.24431	44.8		50	2025	2021-01-04
Weissella confusa	BCC 4255	SAMN14219527	PRJNA609074	GCA_016466205.1	Contig	2.08029	45		88	1815	2021-01-04
Weissella confusa	CCK931	SAMN15636629	PRJNA648178	GCA_014061025.1	Scaffold	2.27784	44.7		27	2095	2020-08-04
Weissella confusa	CCUG 17582	SAMN14219528	PRJNA609074	GCA_016466195.1	Contig	2.34066	44.6		82	2170	2021-01-04
Weissella confusa	CCUG 30763	SAMN14219529	PRJNA609074	GCA_016466175.1	Contig	2.29234	44.8		24	2078	2021-01-04
Weissella confusa	CCUG 30943	SAMN14219530	PRJNA609074	GCA_016466155.1	Contig	2.33399	44.7		48	2138	2021-01-04
Weissella confusa	CCUG 30969	SAMN14219531	PRJNA609074	GCA_016466115.1	Contig	2.31172	44.8		42	2114	2021-01-04
Weissella confusa	CCUG 36556	SAMN14219532	PRJNA609074	GCA_016466065.1	Contig	2.18115	44.8		30	2008	2021-01-04
Weissella confusa	CCUG 37938	SAMN14219533	PRJNA609074	GCA_016466085.1	Contig	2.24422	44.8		54	2075	2021-01-04
Weissella confusa	CCUG 39150	SAMN14219534	PRJNA609074	GCA_016466095.1	Contig	2.25052	44.8		38	2019	2021-01-04
Weissella confusa	CCUG 39518	SAMN08627304	PRJNA436478	GCA_004766095.1	Contig	2.27617	44.7		40	2117	2019-04-09
Weissella confusa	CCUG 39957	SAMN14219536	PRJNA609074	GCA_016466005.1	Contig	2.27811	44.6		45	2127	2021-01-04
Weissella confusa	CCUG 41966	SAMN14219537	PRJNA609074	GCA_016465985.1	Contig	2.27988	44.8		41	2072	2021-01-04
Weissella confusa	CCUG 43002	SAMN14219538	PRJNA609074	GCA_016465965.1	Contig	2.41078	44.6		56	2215	2021-01-04
Weissella confusa	CCUG 51220	SAMN08627305	PRJNA436478	GCA_004766115.1	Contig	2.23329	44.7		37	2087	2019-04-09
Weissella confusa	CCUG 54486	SAMN14219540	PRJNA609074	GCA_016465865.1	Contig	2.22079	44.8		54	2035	2021-01-04
Weissella confusa	CCUG 58143	SAMN14219541	PRJNA609074	GCA_016465875.1	Contig	2.19824	44.7		39	2009	2021-01-04
Weissella confusa	CCUG 61560	SAMN14219542	PRJNA609074	GCA_016465835.1	Contig	2.26039	44.7		47	2071	2021-01-04
Weissella confusa	CIP 102578	SAMN14219543	PRJNA609074	GCA_016465895.1	Contig	2.26067	44.7		49	2090	2021-01-04
Weissella confusa	DSM 20194	SAMN14219499	PRJNA609074	GCA_016466705.1	Contig	2.20896	44.7		37	2032	2021-01-04
Weissella confusa	EJ12	SAMN08627297	PRJNA436478	GCA_004766215.1	Contig	2.27273	44.7		75	2096	2019-04-09
Weissella confusa	EJ52	SAMN08627298	PRJNA436478	GCA_004766325.1	Contig	2.25522	44.7		40	2065	2019-04-09
Weissella confusa	EJ61	SAMN08627299	PRJNA436478	GCA_004766195.1	Contig	2.22189	44.7		60	2025	2019-04-09
Weissella confusa	F71	SAMN08627300	PRJNA436478	GCA_004766205.1	Contig	2.3223	44.6		39	2143	2019-04-09
Weissella confusa	FS54	SAMN15812295	PRJNA656999	GCA_014332815.1	Scaffold	2.29455	44.7		24	1809	2020-08-28
Weissella confusa	L9	SAMN18537422	PRJNA718519	GCA_018390755.1	Scaffold	2.33784	44.7		318	2140	2021-05-17
Weissella confusa	LBAE C39-2	SAMEA2272020	PRJEA78999	GCA_000239955.2	Contig	2.28402	44.8		71	2110	2011-12-21
Weissella confusa	LM1	SAMN20587850	PRJNA752246	GCA_019576155.1	Complete	2.52943	44.4213	chromosome:NZ_CP080582.1/CP080582.1; plasmid unnamed:NZ_CP080583.1/CP080583.1	2	2299	2021-08-12
Weissella confusa	LMG 11983	SAMN14219500	PRJNA609074	GCA_016466635.1	Contig	2.38578	44.7		152	2148	2021-01-04
Weissella confusa	LMG 14040	SAMN14219544	PRJNA609074	GCA_016465845.1	Contig	2.16139	45		29	1911	2021-01-04
Weissella confusa	LMG 17695	SAMN14219501	PRJNA609074	GCA_016466645.1	Contig	2.2375	44.8		30	2054	2021-01-04
Weissella confusa	LMG 17696	SAMN14219502	PRJNA609074	GCA_016466695.1	Contig	2.2409	44.9		42	2004	2021-01-04
Weissella confusa	LMG 17698	SAMN14219503	PRJNA609074	GCA_016466655.1	Contig	2.26888	44.8		44	2028	2021-01-04
Weissella confusa	LMG 17705	SAMN14219504	PRJNA609074	GCA_016466615.1	Contig	2.17082	44.9		30	1972	2021-01-04
Weissella confusa	LMG 18475	SAMN14219505	PRJNA609074	GCA_016466595.1	Contig	2.14901	44.8		75	1945	2021-01-04
Weissella confusa	LMG 18476	SAMN14219506	PRJNA609074	GCA_016466515.1	Contig	2.33839	44.6		44	2167	2021-01-04
Weissella confusa	LMG 18477	SAMN14219507	PRJNA609074	GCA_016466565.1	Contig	2.33811	44.6		42	2162	2021-01-04
Weissella confusa	LMG 18478	SAMN14219508	PRJNA609074	GCA_016466495.1	Contig	2.33819	44.6		42	2162	2021-01-04
Weissella confusa	LMG 27187	SAMN14219509	PRJNA609074	GCA_016466545.1	Contig	2.33094	44.6		99	2164	2021-01-04
Weissella confusa	MBF8-1	SAMN05928586	PRJNA349218	GCA_001884305.1	Contig	2.18164	44.7		44	1896	2016-11-18
Weissella confusa	MGYG-HGUT-00155	SAMEA5849656	PRJEB33885	GCA_902363865.1	Scaffold	2.34633	44.6		29	2187	2019-08-12
Weissella confusa	N17	SAMN14115307	PRJNA606922	GCA_011044335.1	Complete	2.33239	44.8984	chromosome:NZ_CP049097.1/CP049097.1; plasmid p1:NZ_CP049098.1/CP049098.1; plasmid p2:NZ_CP049099.1/CP049099.1; plasmid p3:NZ_CP049100.1/CP049100.1	4	2148	2020-03-01
Weissella confusa	N65	SAMN19374073	PRJNA733006	GCA_018916945.1	Contig	2.25913	44.6		36	2115	2021-06-16
Weissella confusa	NBRC 106469	SAMD00171879	PRJDB6253	GCA_007991875.1	Contig	2.19206	44.7		41	2034	2019-07-31
Weissella confusa	UC 010F3	SAMN14219514	PRJNA609074	GCA_016466525.1	Contig	2.359	44.6		23	2136	2021-01-04
Weissella confusa	UC 024F6	SAMN14219515	PRJNA609074	GCA_016466475.1	Contig	2.30203	44.6		55	2132	2021-01-04
Weissella confusa	UC 048F3	SAMN14219516	PRJNA609074	GCA_016466435.1	Contig	2.29129	44.6		47	2117	2021-01-04
Weissella confusa	UC 710F16	SAMN14219517	PRJNA609074	GCA_016466395.1	Contig	2.28579	44.7		29	2110	2021-01-04
Weissella confusa	UC 724F13	SAMN14219518	PRJNA609074	GCA_016466405.1	Contig	2.33538	44.7		25	2110	2021-01-04
Weissella confusa	UC 748F4	SAMN14219519	PRJNA609074	GCA_016466375.1	Contig	2.27187	44.8		41	2048	2021-01-04
Weissella confusa	UC4052	SAMN11026759	PRJNA524466	GCA_014694545.1	Contig	2.33295	44.5		27	2148	2020-09-22
Weissella confusa	VTT E-062653	SAMN08627290	PRJNA436478	GCA_004766315.1	Contig	2.21504	44.9		95	1980	2019-04-09
Weissella confusa	VTT E-072748	SAMN08627291	PRJNA436478	GCA_004766305.1	Contig	2.38425	44.6		41	2186	2019-04-09
Weissella confusa	VTT E-133279	SAMN08627292	PRJNA436478	GCA_004771075.1	Complete	2.21676	45.0836	chromosome:NZ_CP027563.1/CP027563.1; plasmid pWconfE3279-1:NZ_CP027564.1/CP027564.1	2	1956	2019-04-11
Weissella confusa	VTT E-143403	SAMN08627293	PRJNA436478	GCA_004766395.1	Contig	2.17888	45		13	1956	2019-04-09
Weissella confusa	VTT E-153457	SAMN08627294	PRJNA436478	GCA_004766405.1	Contig	2.34057	44.8		127	2138	2019-04-09
Weissella confusa	VTT E-153460	SAMN08627295	PRJNA436478	GCA_004766265.1	Contig	2.17963	45		17	1958	2019-04-09
Weissella confusa	VTT E-163496	SAMN08627296	PRJNA436478	GCA_004766225.1	Contig	2.31899	44.6		88	2143	2019-04-09
Weissella confusa	VTT E-90392	SAMN08627287	PRJNA436478	GCA_004771295.1	Complete	2.37329	44.8554	chromosome:NZ_CP027565.1/CP027565.1; plasmid pWconfE392-1:NZ_CP027566.1/CP027566.1; plasmid pWconfE392-1:NZ_CP027567.1/CP027566.1; plasmid pWconfE392-2:NZ_CP027568.1/CP027568.1	4	2162	2019-04-11
Weissella confusa	VTT E-90393	SAMN08627288	PRJNA436478	GCA_004766425.1	Contig	2.21516	44.7		46	2045	2019-04-09
Weissella confusa	VTT E-95616	SAMN08627289	PRJNA436478	GCA_004766355.1	Contig	2.24674	44.8		139	1969	2019-04-09
Weissella confusa	WcL17	SAMN15393800	PRJNA642311	GCA_015594935.1	Contig	2.31052	44.7		30	2129	2020-11-18
Weissella confusa	Wcp3a	SAMN15393801	PRJNA642311	GCA_015594955.1	Contig	2.22675	44.7		45	2038	2020-11-18
Weissella cryptocerci	26KH-42	SAMN10737330	PRJNA514919	GCA_004358325.1	Complete	3.02065	41.1		1	2634	2019-03-20
Weissella diestrammenae	KACC 16890	SAMN15892525	PRJNA658885	GCA_014397255.1	Complete	1.65938	39.4		1	1511	2020-09-02
Weissella fabalis	CCUG 61472	SAMN14517847	PRJNA622446	GCA_012396505.1	Contig	1.96245	36.4		25	1843	2020-04-15
Weissella halotolerans	DSM 20190	SAMN02797799	PRJNA222257	GCA_001436865.1	Scaffold	1.36607	43.1		12	1301	2015-11-06
Weissella halotolerans	DSM 20190	SAMN02440571	PRJNA185373	GCA_000420365.1	Scaffold	1.35838	43.1		6	1297	2013-07-09
Weissella hellenica	0916-4-2	SAMN10386365	PRJNA503947	GCA_006777025.1	Complete	1.93754	36.8819	chromosome:NZ_CP033608.1/CP033608.1; plasmid pWHSP020:NZ_CP033610.1/CP033610.1; plasmid pWHSP041:NZ_CP033609.1/CP033609.1	3	1796	2019-07-09
Weissella hellenica	1.2.50	SAMN18994828	PRJNA674638	GCA_018993865.1	Contig	1.96009	36.7		21	1850	2021-06-23
Weissella hellenica	CBA3632	SAMN11843665	PRJNA544551	GCA_007954725.1	Complete	1.99943	36.7496	chromosome:NZ_CP042399.1/CP042399.1; plasmid unnamed1:NZ_CP042400.1/CP042400.1; plasmid unnamed2:NZ_CP042401.1/CP042401.1; plasmid unnamed3:NZ_CP042402.1/CP042402.1; plasmid unnamed4:NZ_CP042403.1/CP042403.1	5	1834	2019-08-11
Weissella hellenica	CCUG 33494	SAMN14517848	PRJNA622446	GCA_012396435.1	Contig	1.8187	37		27	1648	2020-04-15
Weissella hellenica	NBRC 15553	SAMD00097587	PRJDB6035	GCA_006540065.1	Contig	1.80824	37		45	1665	2019-06-12
Weissella hellenica	NBRC 15553	SAMD00164451	PRJDB7793	GCA_005405545.1	Scaffold	1.81462	37		28	1664	2019-03-29
Weissella hellenica	R-53116	SAMN04487795	PRJEB15015	GCA_900095015.1	Scaffold	1.81649	37		31	1679	2016-08-03
Weissella hellenica	Wikim14	SAMD00017703	PRJDB2932	GCA_000715455.1	Contig	1.91562	36.6		30	1828	2014-06-26
Weissella jogaejeotgali	FOL01	SAMN04193338	PRJNA299085	GCA_001932615.1	Complete	2.14954	38.8049		2	1990	2017-01-04
Weissella kandleri	DSM 20593	SAMN02797804	PRJNA222257	GCA_001438705.1	Scaffold	1.33444	39.7		21	1250	2015-11-06
Weissella koreensis	CBA3615	SAMN13258984	PRJNA588925	GCA_009697245.1	Chromosome	1.51181	35.4436	chromosome:NZ_CP046070.1/CP046070.1; plasmid unnamed1:NZ_CP046071.1/CP046071.1	2	1380	2019-11-23
Weissella koreensis	KACC 15510	SAMN02603132	PRJNA67979	GCA_000219805.1	Complete	1.44147	35.5158	chromosome:NC_015759.1/CP002899.1; plasmid WKp2903:NC_015756.1/CP002900.1	2	1336	2011-06-30
Weissella koreensis	KCTC 3621	SAMN02469598	PRJNA77667	GCA_000277645.1	Contig	1.72894	35.5		17	1647	2012-07-10
Weissella koreensis	SK	SAMN12639344	PRJNA562390	GCA_014672875.1	Complete	1.46209	35.51	chromosome:NZ_CP043431.1/CP043431.1; plasmid pCM-SK:NZ_CP043432.1/CP043432.1	2	1306	2020-09-21
Weissella koreensis	WiKim0080	SAMN08517352	PRJNA433774	GCA_002950695.1	Complete	1.53701	35.5415	chromosome:NZ_CP026847.1/CP026847.1; plasmid pWKW_1:NZ_CP026848.1/CP026848.1; plasmid pWKW_2:NZ_CP026849.1/CP026849.1	3	1405	2018-02-26
Weissella minor	Dm-2019-34	SAMN17146155	PRJNA687492	GCA_018257015.1	Scaffold	1.80435	39.1		31	1788	2021-05-04
Weissella minor	DSM 20014	SAMN02797798	PRJNA222257	GCA_001437425.1	Scaffold	1.7685	39.3		31	1765	2015-11-06
Weissella muntiaci	8H-2	SAMN10786232	PRJNA516300	GCA_008107635.1	Scaffold	2.28871	40.5		35	2246	2019-08-26
Weissella oryzae	SG25	SAMD00000341	PRJDB1101	GCA_000691805.2	Scaffold	2.12948	38.9		70	2130	2014-06-10
Weissella paramesenteroides	3.2.24	SAMN18995137	PRJNA674638	GCA_018991665.1	Contig	1.95052	38		31	1843	2021-06-23
Weissella paramesenteroides	A37	SAMN10822536	PRJNA517196	GCA_011009625.1	Contig	1.94082	37.9		20	1824	2020-02-25
Weissella paramesenteroides	ATCC 33313	SAMN00139194	PRJNA34661	GCA_000160575.1	Scaffold	1.98022	38		13	1880	2009-04-20
Weissella paramesenteroides	DmW_107	SAMN12113445	PRJNA550209	GCA_008690185.1	Scaffold	2.01858	38		9	1943	2019-09-23
Weissella paramesenteroides	DmW_107099	SAMN12113442	PRJNA550209	GCA_008690195.1	Contig	1.99153	37.9		48	1918	2019-09-23
Weissella paramesenteroides	DmW_107100	SAMN12113443	PRJNA550209	GCA_008690175.1	Contig	1.9906	37.9		47	1930	2019-09-23
Weissella paramesenteroides	DmW_107101	SAMN12113447	PRJNA550209	GCA_008690135.1	Contig	1.99293	37.9		48	1923	2019-09-23
Weissella paramesenteroides	DmW_107102	SAMN12113446	PRJNA550209	GCA_008690155.1	Contig	1.99267	37.9		50	1921	2019-09-23
Weissella paramesenteroides	DmW_107104	SAMN12113448	PRJNA550209	GCA_008690065.1	Contig	1.9931	37.9		49	1922	2019-09-23
Weissella paramesenteroides	DmW_107105	SAMN12113449	PRJNA550209	GCA_008690085.1	Contig	1.99001	37.9		47	1928	2019-09-23
Weissella paramesenteroides	DmW_107106	SAMN12113444	PRJNA550209	GCA_008690165.1	Contig	1.9642	37.9		48	1896	2019-09-23
Weissella paramesenteroides	DmW_107108	SAMN12113450	PRJNA550209	GCA_008690075.1	Contig	1.96693	37.9		26	1886	2019-09-23
Weissella paramesenteroides	DmW_109	SAMN12113452	PRJNA550209	GCA_008690035.1	Contig	1.9313	37.9		21	1839	2019-09-23
Weissella paramesenteroides	DmW_109110	SAMN12113451	PRJNA550209	GCA_008690055.1	Contig	1.81988	38		22	1738	2019-09-23
Weissella paramesenteroides	DmW_115	SAMN12113454	PRJNA550209	GCA_008689975.1	Contig	2.00156	37.9		27	1909	2019-09-23
Weissella paramesenteroides	DmW_115112	SAMN12113455	PRJNA550209	GCA_008689965.1	Contig	2.00156	37.9		28	1911	2019-09-23
Weissella paramesenteroides	DmW_115113	SAMN12113456	PRJNA550209	GCA_008689955.1	Contig	2.00141	37.9		24	1907	2019-09-23
Weissella paramesenteroides	DmW_115114	SAMN12113457	PRJNA550209	GCA_008689905.1	Contig	2.00098	37.9		25	1909	2019-09-23
Weissella paramesenteroides	DmW_115116	SAMN12113453	PRJNA550209	GCA_008690005.1	Contig	2.00205	37.9		24	1909	2019-09-23
Weissella paramesenteroides	DmW_118	SAMN12113459	PRJNA550209	GCA_008689895.1	Contig	1.80697	36.5		46	1681	2019-09-23
Weissella paramesenteroides	DmW_118119	SAMN12113458	PRJNA550209	GCA_008689925.1	Contig	1.8103	36.5		49	1682	2019-09-23
Weissella paramesenteroides	FDAARGOS_414	SAMN07312458	PRJNA231221	GCA_002386265.1	Complete	1.94791	38.1	chromosome:NZ_CP023501.1/CP023501.1	1	1788	2017-09-28
Weissella paramesenteroides	MGYG-HGUT-01340	SAMEA5850843	PRJEB33885	GCA_902374075.1	Scaffold	1.98022	38		13	1881	2019-08-12
Weissella paramesenteroides	N43	SAMN10822537	PRJNA517196	GCA_011009575.1	Contig	1.9436	37.9		20	1824	2020-02-25
Weissella paramesenteroides	STCH-BD1	SAMN16830909	PRJNA679383	GCA_015689215.1	Chromosome	2.05254	38.1422	chromosome:NZ_CP065046.1/CP065046.1; plasmid pWpSTCH-BD1:NZ_CP065045.1/CP065045.1	2	1922	2020-11-25
Weissella paramesenteroides	TR212	SAMN09099489	PRJNA470672	GCA_006406215.1	Contig	1.97781	38.1		22	1876	2019-06-24
Weissella paramesenteroides	WpK4	SAMN10880043	PRJNA521101	GCA_004214915.1	Scaffold	2.03916	38.2924	plasmid pWpK4.1:NZ_CM014767.1/CM014767.1; plasmid pWpK4.2:NZ_CM014768.1/CM014768.1; plasmid pWpK4.3:NZ_CM014769.1/CM014769.1; plasmid pWpK4.5:NZ_CM014770.1/CM014770.1; plasmid pWpK4.6:NZ_CM014771.1/CM014771.1; plasmid pWpK4.7:NZ_CM014772.1/CM014772.1	10	1855	2019-02-20
Weissella soli	CBA3633	SAMN11843678	PRJNA544551	GCA_007954545.1	Chromosome	1.73154	43.6231	chromosome:NZ_CP042377.1/CP042377.1; plasmid unnamed1:NZ_CP042378.1/CP042378.1; plasmid unnamed2:NZ_CP042379.1/CP042379.1; plasmid unnamed3:NZ_CP042380.1/CP042380.1; plasmid unnamed4:NZ_CP042381.1/CP042381.1	5	1616	2019-08-11
Weissella soli	CCUG 46608	SAMN14517849	PRJNA622446	GCA_012396465.1	Contig	1.65878	43.6		9	1532	2020-04-15
Weissella soli	CECT 7031	SAMN09075497	PRJNA463304	GCA_003353445.1	Scaffold	1.6584	43.6		7	1539	2018-08-02
Weissella soli	KACC 11848	SAMN05787364	PRJNA343417	GCA_001761545.1	Complete	1.68318	43.7	chromosome:NZ_CP017326.1/CP017326.1	1	1538	2016-10-13
Weissella soli	NBRC 106074	SAMD00170757	PRJDB6219	GCA_007991555.1	Contig	1.65519	43.6		12	1536	2019-07-31
Weissella sp. DD23	DD23	SAMN04325049	PRJNA304333	GCA_001579105.1	Scaffold	2.54496	45		153	2196	2016-03-02
Weissella sp. W-1	W-1	SAMN19073739	PRJNA728255	GCA_018502505.1	Complete	1.38604	40.7	chromosome:NZ_CP075544.1/CP075544.1	1	1307	2021-05-26
Weissella sp. X0278	X0278	SAMD00202785	PRJDB7793	GCA_010306265.1	Contig	1.86753	36.6		20	1746	2020-01-28
Weissella sp. X0401	X0401	SAMD00202786	PRJDB7793	GCA_010306445.1	Contig	1.92017	36.5		28	1827	2020-01-28
Weissella sp. X0750	X0750	SAMD00164310	PRJDB7793	GCA_005405285.1	Scaffold	1.93458	36.7		29	1833	2019-03-29
Weissella thailandensis	CCUG 46557	SAMN14517850	PRJNA622446	GCA_012396385.1	Contig	1.96944	38.7		32	1857	2020-04-15
Weissella thailandensis	JCM 10695	SAMD00164319	PRJDB7793	GCA_005405465.1	Scaffold	1.97461	38.7		43	1885	2019-03-29
Weissella thailandensis	KCTC 3751	SAMN09736161	PRJNA483368	GCA_003363255.1	Contig	1.98382	38.7		65	1897	2018-08-04
Weissella thailandensis	NBRC 109621	SAMD00172677	PRJDB6342	GCA_007992575.1	Contig	1.95189	38.7		57	1849	2019-07-31
Weissella uvarum	DSM 28060	SAMN17619944	PRJNA695596	GCA_016908785.1	Contig	1.68001	39.9		15	1644	2021-02-19
Weissella viridescens	DSM 20410	SAMN02797781	PRJNA222257	GCA_001437355.1	Scaffold	1.53717	41.1		8	1463	2015-11-06
Weissella viridescens	LB10G	SAMN20672826	PRJNA753089	GCA_019641425.1	Contig	1.5815	41.1		18	1505	2021-08-16
Weissella viridescens	MFPC16A2805	SAMEA104285206	PRJEB22329	GCA_900216215.1	Chromosome	1.04068	40.9921	chromosome MFPC16A2805:LT907932.1	3	1048	2017-09-13
Weissella viridescens	NBRC 3949	SAMD00093695	PRJDB6036	GCA_006538805.1	Contig	1.48032	41.2		22	1396	2019-06-12
Weissella viridescens	NCDO 1655	SAMEA3546114	PRJEB10916	GCA_001460875.1	Scaffold	1.55907	41.3		243	1508	2015-11-23
Weissella viridescens	NCTC13645	SAMEA103980430	PRJEB6403	GCA_900460455.1	Contig	1.55521	41.4		9	2700	2018-07-30
Weissella viridescens	NJ100	SAMN16229483	PRJNA664658	GCA_014789145.1	Complete	1.59324	41.2	chromosome:NZ_CP061835.1/CP061835.1	1	1453	2020-09-29
Weissella viridescens	UCO-SMC3	SAMN09991636	PRJNA489880	GCA_003862435.1	Contig	1.61281	41.4		19	1577	2018-12-04
